# Supplementary material
Source: PubMed Central journal article supplement (PMC2875786)

### ESCRT-0 complex

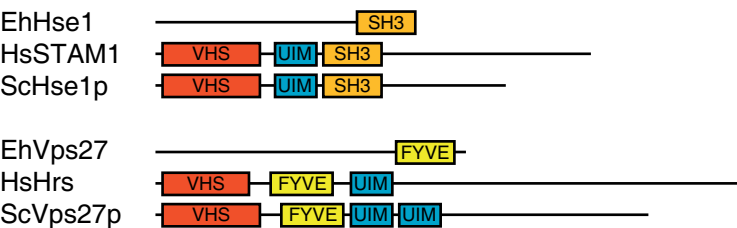

### ESCRT-I complex

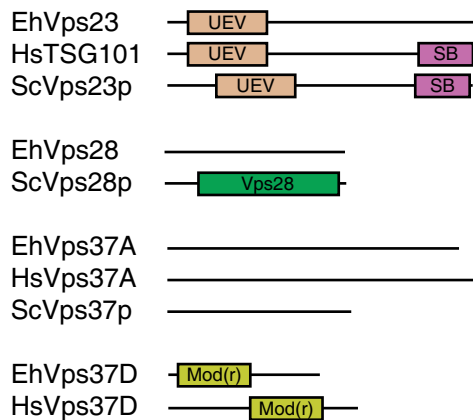

### ESCRT-II complex

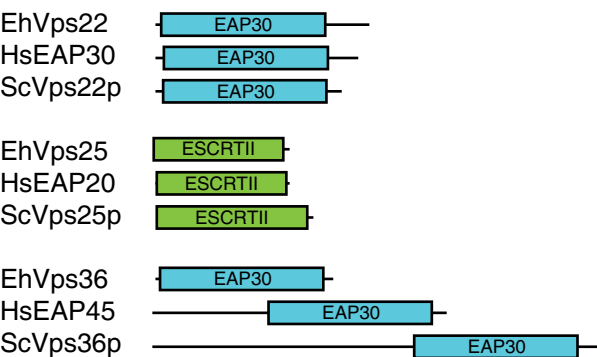

### ESCRT-III complex

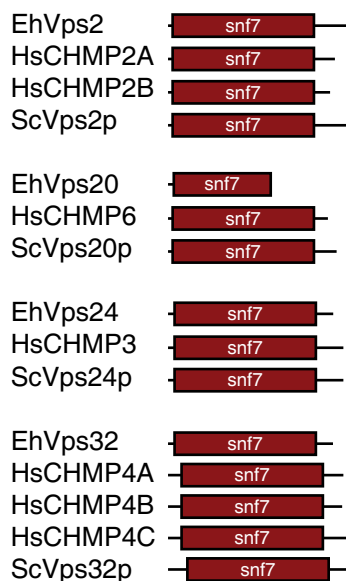

### Vps4

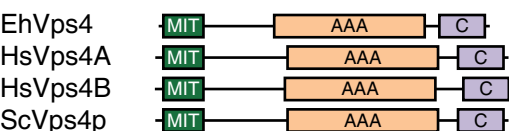

### Other MVB proteins

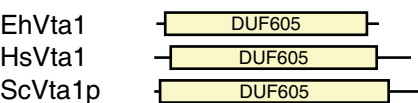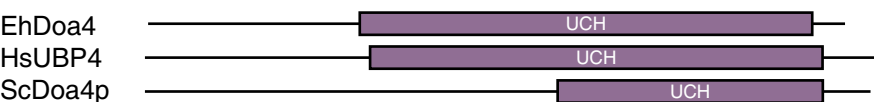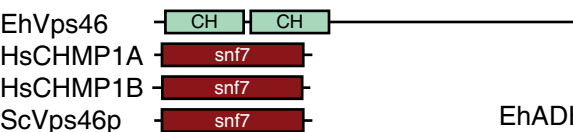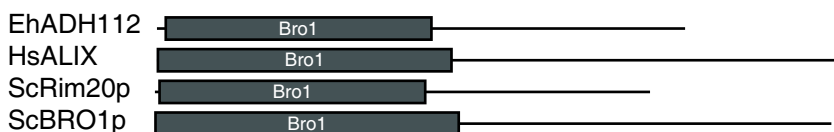

### Ubiquitination components

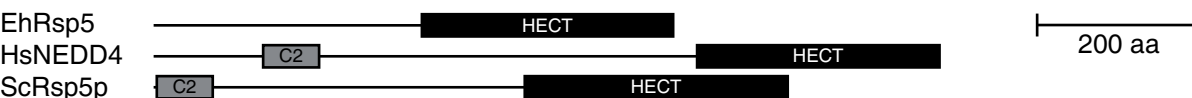

Supplement: 890674.f1.pdf [file 890674.f1.pdf]
